# Supplementary material
Source: Springer Nature journal article supplement (https://www.springermedizin.de/resource/supplementary/12913_2011_2323_MOESM4_ESM.pdf/9529962)

(A)

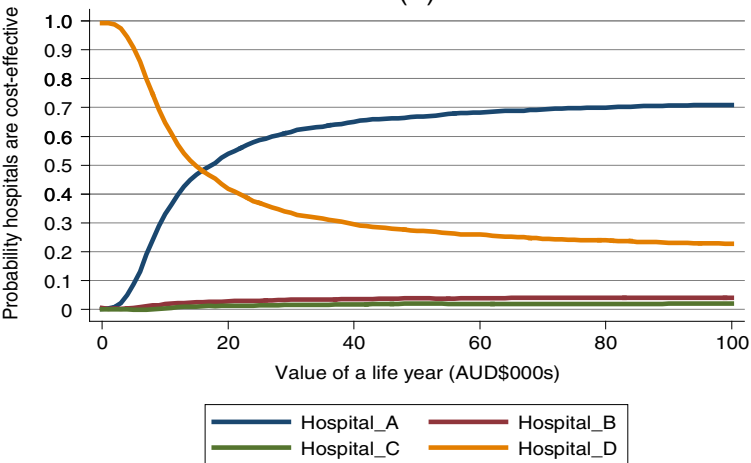

(B)

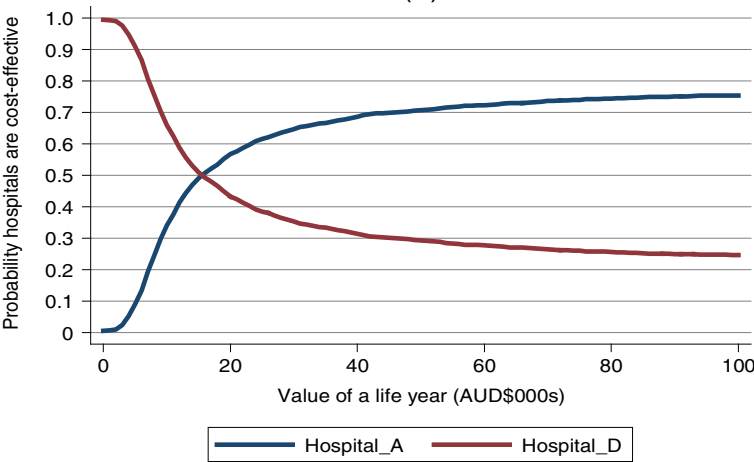

Supplement: MOESM4 [file 9529962]
